1

2 Original Article

3

4 Geographic and temporal trends in fentanyl-detected deaths in Connecticut,

5 2009-2019

6

7 Haidong Lu<sup>1,2</sup>, Forrest W. Crawford<sup>2,3,4,5,6</sup>, Gregg S. Gonsalves<sup>1,2,7</sup>, Laretta E. Grau<sup>1</sup>

8

9 <sup>1</sup>Department of Epidemiology of Microbial Diseases, Yale School of Public Health, New Haven,

10 CT, USA

11 <sup>2</sup>Public Health Modeling Unit, Yale School of Public Health, New Haven, CT, USA

12 <sup>3</sup>Department of Biostatistics, Yale School of Public Health, New Haven, CT, USA

13 <sup>4</sup>Department of Statistics & Data Science, Yale University, New Haven, CT, USA

14 <sup>5</sup>Department of Ecology & Evolutionary Biology, Yale University, New Haven, CT, USA

15 <sup>6</sup>Yale School of Management, New Haven, CT, USA

16 <sup>7</sup>Yale Law School, New Haven, CT, USA

17 **Running title:** Trends in fentanyl-detected deaths in Connecticut

18 **Correspondence:** Gregg Gonsalves

19 Public Health Modeling Unit and Department of Epidemiology of Microbial

20 Diseases

21 Yale School of Public Health

22 350 George Street, Ste 3<sup>rd</sup> Floor

23 New Haven, CT 06511

24 Phone: +1 (203) 606-9149

25 [gregg.gonsalves@yale.edu](mailto:gregg.gonsalves@yale.edu)

26 **Funding sources:** National Institutes of Health/National Institute on Drug Abuse DP2-DA049282

27 and R37DA15612); National Institutes of Health/Eunice Kennedy Shriver

28 National Institute of Child Health and Human Development DP2-HD091799

29 **Conflict of interest:** None declared.

30 **Data and code:** Data are available on request to the authors.

31 **Word count:** abstract 197/200; main text 3091/3000

32 **Acknowledgements:** We are grateful to Dr. James R. Gill and his staff at the Connecticut Office

33 of the Chief Medical Examiner for providing access to data. In addition, we

34 thank Joshua L. Warren, Thomas A. Thornhill, Julia Dennett, and A Ram for

35 helpful comments.

36

37 **ABSTRACT**

38 **Purpose:** Since 2012 fentanyl-detected fatal overdoses have risen from 4% of all fatal overdoses  
39 in Connecticut to 82% in 2019. We aimed to investigate the geographic and temporal trends in  
40 fentanyl-detected deaths in Connecticut during 2009-2019.

41 **Methods:** Data on the dates and locations of accidental/undetermined opioid-detected  
42 fatalities were obtained from Connecticut Office of the Chief Medical Examiner. Using a  
43 Bayesian space-time binomial model, we estimated spatiotemporal trends in the proportion of  
44 fentanyl-detected deaths.

45 **Results:** During 2009-2019, a total of 6,632 opioid deaths were identified. Among these, 3,234  
46 (49%) were fentanyl-detected. The modeled spatial patterns suggested that opioid deaths in  
47 northeastern Connecticut had higher probability of being fentanyl-detected, while New Haven  
48 and its neighboring towns and the southwestern region of Connecticut, primarily Greenwich,  
49 had a lower risk. Model estimates also suggested fentanyl-detected deaths gradually overtook  
50 the preceding non-fentanyl opioid-detected deaths across Connecticut. The estimated temporal  
51 trend showed the probability of fentanyl involvement increased substantially since 2014.

52 **Conclusion:** Our findings suggest that geographic variation exists in the probability of fentanyl-  
53 detected deaths, and areas at heightened risk are identified. Further studies are warranted to  
54 explore potential factors contributing to the geographic heterogeneity and continuing  
55 dispersion of fentanyl-detected deaths in Connecticut.

56 **Keywords:** fentanyl; overdose; opioid crisis; Bayesian disease mapping; spatiotemporal analysis

57

58

## 59 INTRODUCTION

60 The three waves of the American opioid crisis (i.e., prescription opioids, heroin, and synthetic  
61 opioids other than methadone) continue to be a significant public health emergency in the  
62 United States (US).<sup>1</sup> Beginning in late 2013, synthetic opioid overdoses (chiefly illicitly produced  
63 fentanyl and fentanyl analogs) have dominated the ongoing third wave of the opioid crisis.<sup>2</sup>  
64 Illicit drug supply is the key driver of the current opioid crisis.<sup>3</sup> Illicitly manufactured fentanyl  
65 and fentanyl analogs, which are less costly to produce and distribute (but are 50 to 100 times  
66 more potent than morphine),<sup>4</sup> have increased in the US drug market.<sup>5</sup> Reports from the US  
67 Drug Enforcement Administration highlighted the dramatic increase in drug seizures that tested  
68 positive for fentanyl, from 4,642 in 2014 to 98,954 in 2019 in the US.<sup>6,7</sup> The national rate of  
69 drug overdose deaths involving fentanyl increased dramatically from 0.5 per 100,000 persons in  
70 2011 to 5.9 per 100,000 in 2016.<sup>8</sup> From 2014 to 2015, overdose deaths attributed to synthetic  
71 opioids (primarily illicitly manufactured fentanyl) increased by 72% to nearly 10,000.<sup>9</sup> Most  
72 recently, the rate of drug overdose deaths involving synthetic opioids rose by 27%, from 9.0 per  
73 100,000 in 2017 to 11.4 in 2019.<sup>10,11</sup> In 2018, fentanyl and its analogs were detected in  
74 approximately two thirds of opioid deaths.<sup>12</sup>

75  
76 Abrupt-changes in illicit drug supply may have contributed to the heightened risk of opioid  
77 overdoses since 2013 and the influx of fentanyl.<sup>3</sup> Examining the spatiotemporal trends of  
78 fentanyl-detected deaths may help public health researchers and policymakers better  
79 understand geographic and temporal variation in fentanyl availability. While several studies  
80 have been conducted to investigate the small-area geographic distribution of fentanyl-detected

81 overdose deaths<sup>13,14</sup>, to our knowledge, no research has explored whether the fentanyl-  
82 detected overdose deaths simply take over the rising overall opioid overdoses in the same  
83 geographic region or whether fentanyl has established new regions of risk for overdose where,  
84 previously, overdoses were less common.

85  
86 To further inform overdose prevention and intervention efforts, we investigated the geographic  
87 and temporal trends of fentanyl-detected overdose deaths at the city/town level in Connecticut,  
88 a state that is highly affected by the opioid crisis. We examined whether spatiotemporal  
89 distributions of fentanyl-detected overdose deaths covary with overall trends of opioid  
90 overdose deaths, and whether the rising tide of fentanyl-detected overdose deaths follows a  
91 geographic pattern different from that of the preceding wave of opioid overdose deaths. Our  
92 town-level estimates will help support the decision-making of the local health agencies  
93 (organized by town or health districts consisting of several towns) in Connecticut on public  
94 health and surveillance efforts to address the opioid crisis.

95

## 96 **METHODS**

### 97 *Study Sample and Data*

98 We obtained data on all opioid-detected overdose deaths from the records of the Connecticut  
99 Office of the Chief Medical Examiner (OCME), including the cause and manner of death,  
100 toxicological test results in available specimens, demographic information (i.e., age, sex,  
101 race/ethnicity), and the addresses of residence, injury, and/or death for each case.<sup>15,16</sup> In the  
102 OCME records, “opioid detection” in an overdose death means that either an opioid was listed

103 in the cause of death or that a quantifiable amount of an opioid was present in the toxicological  
104 test report.

105  
106 All opioid-detected overdose deaths from 2009 to 2019 in Connecticut that the OCME  
107 determined to be of accidental or undetermined manner were included in this analysis. Non-  
108 residents in Connecticut were excluded. We dichotomized the opioids detected in the overdose  
109 deaths (i.e., fentanyl-detected versus non-fentanyl-detected). Other substances of interest  
110 included heroin/morphine, pharmaceutical opioids (i.e., di-hydrocodeine, hydromorphone,  
111 hydrocodone, hydromorphone, oxymorphone, and tramadol), methadone/buprenorphine,  
112 benzodiazepines, cocaine, ethanol, methamphetamine, xylazine, mitragynine (kratom), and  
113 gabapentin. This research project has been reviewed by the Connecticut OCME and deemed  
114 not human subjects research by the Yale University Human Investigations Committee.

115  
116 *Geospatial Data*

117 All residential, injury, and death addresses were geocoded within ArcGIS (ESRI, Redlands, CA).  
118 Unmatched addresses were then reviewed manually and geocoded using ArcGIS or the R  
119 package *tidygeocoder*<sup>17</sup>. In cases where decedents were listed as homeless or where no address  
120 was recorded, these cases were not geocoded. Decedents with residential addresses outside  
121 Connecticut were excluded. Injury addresses were used as primary locales for the space-time  
122 model and mapping the spatial trends. If injury addresses were unknown, residential addresses  
123 were used instead. If both addresses were unknown, death addresses were used. The geocoded

124 overdose deaths were then assigned to one of the 169 corresponding cities or towns in  
125 Connecticut.

126

### 127 *Covariates*

128 We used demographic information available for residential population at the city/town level in  
129 the Connecticut from the American Community Survey (ACS).<sup>18</sup> We linked these with the  
130 city/town-level ACS 5-year estimates from 2015-2019 data and 2010-2014 data to the opioid-  
131 detected overdose death records in 2015-2019 and in 2009-2014, respectively. The covariates  
132 were the total population size, proportion of the population by demographic covariates (i.e.,  
133 age groups, sex, race, ethnicity and education level), proportion foreign born, the proportion  
134 with home ownership, median household income, and poverty rate.

135

### 136 *Statistical Analyses*

137 We first described demographic information of the decedents with opioid-detected fatal  
138 overdoses in Connecticut, stratified by fentanyl-detected overdose deaths and non-fentanyl  
139 overdose deaths. Then we examined spatiotemporal trends in counts of opioid-detected  
140 overdose deaths within towns in Connecticut. We modelled the count of opioid-detected  
141 overdose deaths  $n_{it}$  in town  $i$  during year  $t$  as independently and identically Poisson distributed  
142 variables with mean  $\lambda_{it}$ ,

$$n_{it} \sim \text{Poisson}(\lambda_{it})$$

143 The logarithm of the mean number of opioid-detected overdose deaths ( $\lambda_{it}$ ) was then modeled  
144 as

$$\log(\lambda_{it}) = \mathbf{x}_{it}^T \boldsymbol{\beta} + \alpha_i + \gamma_t + \delta_{it} + \log(\text{pop}_n)$$

145 where  $\mathbf{x}_{it}$  is the vector of covariates for town  $i$  at year  $t$  (including the time-varying and space-  
146 varying variables from the ACS), and  $\boldsymbol{\beta}$  is a vector of fixed effect coefficients for  $\mathbf{x}_{it}$ . In addition,  
147  $\alpha_i$  is the town-level spatial main effect,  $\gamma_t$  is the yearly temporal main effect, and  $\delta_{it}$  is the  
148 interaction term between space (town level) and time (year). The population size in each  
149 city/town was included as an offset  $\log(\text{pop}_n)$  for the Poisson model. The spatial term  $\alpha_i$  is a  
150 random effect that follows the conditional autoregressive model proposed by Besag, York and  
151 Mollie.<sup>19</sup> The random effect can be further decomposed into two components, an intrinsic  
152 conditional autoregressive term that smooths each city/town-level estimate by forming a  
153 weighted average with all adjacent jurisdictions, plus a spatially unstructured component that  
154 models independent location-specific error and is assumed to be independently, identically,  
155 and normally distributed across cities or towns. The temporal trend  $\gamma_t$  is modeled by the sum of  
156 two components, a first-order random walk-correlated time component, and a temporally  
157 unstructured component that models independent year-specific error and is independently,  
158 identically, and normally distributed across calendar years. The space-time interaction term  $\delta_{it}$ ,  
159 is modelled as an independent noise term for each city/town and time period and allows for  
160 temporal trends in a given city/town to deviate from the overall spatial and temporal trends  
161 given by  $\alpha_i$  and  $\gamma_t$ , so that local patterns can emerge across time and space. Gamma priors  
162 were assigned to the precision hyperparameters in our models. Details of the model  
163 specification are described in Appendix S1. It should be noted that here we aimed to model the  
164 mean count of opioid-detected overdose deaths in each town during each year, and therefore  
165 we directly included  $\lambda_{it}$  in the Poisson model rather than decompose  $\lambda_{it}$  into expected number



166 and relative risk. In addition, given that there were a considerable number of towns with no  
167 opioid overdose deaths especially in the earlier years during the study period, we implemented  
168 the zero-inflated Poisson model to account for excess zeroes. The model comparison of the  
169 Poisson and zero-inflated Poisson models are shown in Appendix S2. We also conducted a  
170 sensitivity analysis that used penalized complexity (PC) priors<sup>20,21</sup> to the precision  
171 hyperparameters instead of gamma priors (see Appendix S3).

172  
173 To investigate the conditional probability of fentanyl detection given that a fatal opioid-  
174 involved overdose occurred, we modelled the probability of an opioid overdose death being  
175 fentanyl-detected at the city/town level, using a Bayesian space-time binomial model.<sup>22</sup> Unlike  
176 the Poisson regression directly modeling the count data, the binomial model represents the  
177 probability of fentanyl detection given an opioid-detected death. This can tell us whether the  
178 conditional risk of fentanyl detection, given an opioid fatal overdose, varies over space and time.  
179 Specifically, we considered a binomial model for the number of fentanyl-detected overdose  
180 deaths conditional on the total number of opioid overdose deaths in the town areas. Let  $p_{it}$  be  
181 the probability of an opioid overdose death being fentanyl-detected in town  $i$  during year  $t$ . We  
182 assumed that the number of fentanyl-detected overdose deaths  $y_{it}$  in town  $i$  during year  $t$  is  
183 distributed as

$$y_{it} \sim \text{Binomial}(p_{it}, n_{it})$$

184 and the corresponding likelihood is

$$185 \quad L(y_{it}|p_{it}, n_{it}) = \prod_i \prod_t \binom{n_{it}}{y_{it}} p_{it}^{y_{it}} (1 - p_{it})^{(n_{it}-y_{it})}.$$

186 A logistic regression was used to model the probability  $p_{it}$ , as

$$\text{logit}(p_{it}) = \mathbf{x}_{it}\boldsymbol{\theta} + \mu_i + \varphi_t + \sigma_{it}$$

187 where, similar to model for opioid-detected overdose deaths,  $\mathbf{x}_{it}$  is the vector of covariates for  
188 city/town  $i$  at year  $t$  (including the time-varying and space-varying variables from the ACS), and  
189  $\boldsymbol{\theta}$  is a vector of fixed effect coefficients for  $\mathbf{x}_{it}$ . In addition,  $\mu_i$  in the model is the city/town-level  
190 spatial main effect,  $\varphi_t$  is the yearly temporal main effect, and  $\sigma_{it}$  is the interaction term  
191 between space (city/town level) and time (year). In addition, we conducted three sensitivity  
192 analyses to assess the robustness of our results: 1) as an alternative, we constructed a Poisson  
193 model for counts of fentanyl-detected overdose deaths among opioid overdose deaths; 2) we  
194 restricted the analytical sample to adult (aged  $\geq 18$ ) opioid-detected overdose deaths; 3) we  
195 used PC priors to the precision hyperparameters instead of gamma priors.

196

197 Finally, we used likelihood ratio tests to examine whether the space-time interaction terms  
198 were significantly different from zero in all models. When this term is not significantly different  
199 from zero, it suggests that the geographic pattern of fentanyl-detected overdose deaths does  
200 not vary significantly over the study period.

201

202 To estimate Bayesian model parameters, we employed integrated nested Laplace  
203 approximations (INLAs) which approximate the full posterior distribution and are a  
204 computationally efficient alternative to Markov Chain Monte Carlo.<sup>23</sup> Briefly, under certain  
205 models (e.g., latent Gaussian models), INLA approximates the marginal posterior distribution of  
206 estimated parameters using a multivariate normal distribution.<sup>23,24</sup> We used the *R-INLA*  
207 package for model fitting and estimation.<sup>25</sup> Model comparison was performed, and details can

208 be found in Appendix S2. All analyses were performed using R Statistical Software (version 4.0.2;  
209 R Foundation for Statistical Computing, Vienna, Austria).

210

## 211 **RESULTS**

212 A total of 6,632 opioid-detected overdose deaths were identified by the Connecticut OCME  
213 between 2009 and 2019, after excluding 27 deaths with residential addresses outside  
214 Connecticut. Among these, 3,234 (49%) were fentanyl-detected, and 3,398 (51%) were non-  
215 fentanyl-detected fatalities. The characteristics of these overdose deaths are described in Table  
216 1. People who died of fentanyl-detected overdose deaths were more likely to be male, Black,  
217 Hispanic, or involve at least one of the following substances: cocaine, xylazine, gabapentin or  
218 mitragynine, compared with those who died of non-fentanyl-detected overdose. The  
219 characteristics of overall opioid-detected overdose deaths as well as fentanyl-detected  
220 overdose deaths stratified by calendar year are shown in Appendix S4.

221

222 Figure 1 shows the observed temporal trend of fentanyl-detected overdose deaths and non-  
223 fentanyl overdose deaths in Connecticut during the study period 2009-2019. Fentanyl-detected  
224 overdose deaths increased significantly since 2014. In 2019, 977 (86%) of the 1,138 opioid-  
225 detected overdose deaths were fentanyl-detected, compared to 15 (6%) of 266 opioid-detected  
226 overdose deaths in 2009 and 36 (8%) of 429 opioid-detected overdose deaths in 2013. The  
227 yearly geographic patterns of observed proportion being fentanyl-detected among opioid-  
228 detected overdose deaths at the town level are shown in Appendix S5.

229

230 Model comparison of the Poisson and zero-inflated Poisson models supported the choice of  
231 Poisson model (see Appendix S2). Posterior distributions of estimated parameters for spatial  
232 ( $\alpha_i$ ) and temporal ( $\gamma_t$ ) random effects (while holding other terms constant) of Bayesian space-  
233 time Poisson model for overall opioid-detected overdose deaths are shown in Figure 2. Some  
234 towns – Torrington and Southington – were at heightened risk of opioid-detected overdose  
235 deaths. The temporal trends showed the risk of opioid-detected overdose deaths among  
236 residents in Connecticut increased substantially from 2009 to 2019, although there was a slight  
237 decrease in 2018.

238  
239 Based on the fitted Bayesian space-time binomial model for the proportion of fentanyl-  
240 detected overdose deaths, posterior distributions of the fixed-effect coefficients ( $\theta$ ) of  
241 covariates are summarized in Figure 3. Increased proportion of residents aged 55-64 in a  
242 city/town was associated with decreased probability being fentanyl-detected, given an opioid-  
243 detected overdose death in that town, with an odds ratio (OR) of 0.92 (95% credible interval  
244 [CrI], 0.86, 0.99). In addition, the proportion in poverty was negatively associated with the  
245 probability of a fatal overdose being fentanyl-detected (OR=0.95 [95% CrI, 0.91, 0.99]).

246  
247 Posterior distributions of estimated parameters for spatial ( $\mu_i$ ) and temporal ( $\varphi_t$ ) random  
248 effects (while holding other terms constant) are summarized in Figure 4, along with geographic  
249 patterns across towns. Some areas had increased probability of fentanyl involvement, and the  
250 spatial modeling (holding temporal terms constant) suggests that even after adjusting for the  
251 city/town level demographic covariates, the northeastern region of Connecticut had a higher

252 probability of fentanyl-detected deaths, with Hartford, East Hartford and Manchester at the  
253 highest risk. In contrast, New Haven and its surrounding towns and the southwestern  
254 Connecticut—primarily Greenwich—had a lower probability of fentanyl-detected deaths. The  
255 temporal trends in Figure 4 describe main temporal trends similar to those observed in Figure 1,  
256 that is, that the probability of an opioid overdose death being fentanyl-detected increased  
257 monotonically since 2014.

258  
259 The city/town-level predicted probabilities of being a fentanyl-detected overdose death from  
260 the Bayesian space-time binomial model are shown in Figure 5. A higher probability being  
261 fentanyl-detected, given an opioid overdose death, was first found in several towns in the  
262 northeastern region of Connecticut during 2009-2013. Beginning in 2014, the fentanyl  
263 “hotspots” started to spread across Connecticut.

264  
265 A likelihood ratio test shows that the space-time interaction term of the Bayesian space-time  
266 binomial model for the proportion of fentanyl-detected opioid overdose deaths was not  
267 significantly different from zero, suggesting the geographic patterns of fentanyl-detected  
268 overdose deaths gradually overtook the preceding non-fentanyl opioid overdose deaths.

269  
270 The results of the sensitivity analyses 1) using Poisson model for fentanyl-detected overdose  
271 deaths in Connecticut, 2) restricting to adult opioid-detected overdose deaths, or 3) using PC  
272 priors for prior distribution of hyperparameters were similar to those using a binomial logistic  
273 model and are described in Appendix S6.

274

275 **DISCUSSION**

276 In the present study we examined the town-level geographic patterns and yearly temporal  
277 trends of fentanyl-detected overdose deaths among Connecticut residents during 2009-2019  
278 and evaluated the relationship of fentanyl-detected overdose deaths with overall trends of  
279 opioid-detected overdose deaths. To our knowledge, this is the first study to map the  
280 spatiotemporal distributions of fentanyl-detected overdose deaths in Connecticut. We  
281 identified regions of Connecticut, particularly in the northeastern part of the state, as having  
282 relatively high probability of an opioid overdose death being fentanyl-detected. The temporal  
283 trends show the fentanyl-detected overdose deaths in Connecticut increased significantly since  
284 2014. We also found that the geographic pattern of fentanyl-detected overdose deaths was  
285 relatively constant over time and gradually replaced the preceding wave of opioid overdose  
286 deaths.

287

288 Our findings show that, compared with non-fentanyl overdose deaths, people who died of  
289 fentanyl-detected overdose are more likely to be Black or Hispanic in Connecticut, suggesting  
290 that these groups are disproportionately affected by the most recent waves of opioid crisis.  
291 These results are consistent with the findings from previous studies that examined opioid-  
292 detected overdose deaths in other regions and across the US.<sup>26-28</sup> More research is warranted  
293 to address the social determinants of fentanyl-detected overdose deaths among Black and  
294 Hispanic communities, and locally informed harm reduction efforts and services should be  
295 targeted to these populations.

296

297 Our results indicated that the northeastern region of Connecticut had higher probability of an  
298 opioid overdose death being fentanyl-detected whereas New Haven, its surrounding towns,  
299 and the southwestern Connecticut had a lower probability. This suggests that the Connecticut  
300 supply of fentanyl and its analogues may have originally entered Connecticut from the north,  
301 gradually diffused from the northeastern to southwestern Connecticut, and most recently has  
302 dispersed across the state. Our findings also suggest that the fentanyl-detected overdose  
303 deaths might have simply replaced the preceding waves of opioid overdose deaths (e.g., heroin),  
304 rather than creating new overdose risk following distinct geographic patterns. These findings  
305 were in line with the facts that fentanyl and its analogues entered into illicit drug supply as an  
306 “adulterant” in powder heroin and counterfeit pills in Northeast.<sup>29</sup> The growing presence and  
307 strong potency of fentanyl and its analogues then led to the significant increase in opioid  
308 overdose deaths across Connecticut in recent years.

309

310 Further studies are warranted to explore the potential factors (e.g., supply-side aspects,  
311 neighborhood characteristics, and availability and accessibility of health services and naloxone  
312 distribution) that result in geographical variability in fentanyl-detected overdose mortality. For  
313 example, a recent study in Canada showed the rural areas experienced a disproportionately  
314 high risk of fatal overdoses from illicit drug poisoning compared with urban areas.<sup>30</sup> Such rural-  
315 urban differences may be due to limited access to harm reduction services and rising local drug  
316 toxicity. Our study provides insight into the distinctive geographic patterns in fentanyl mortality  
317 in Connecticut. These findings can inform targeted overdose surveillance in specific regions of

318 the state and guide more efficient deployment of harm reduction services and opioid treatment  
319 programs in Connecticut.

320

321 Our study is subject to several limitations. First, although we adjusted for city/town-level  
322 demographic covariates in our Bayesian space-time models, it is possible that this ecological  
323 analysis obscures individual-level relationships between time, place, and overdose risk. We  
324 described the geographic patterns and temporal trends of fentanyl-detected overdose deaths  
325 at the city/town level only and could not examine in detail the potential social determinants for  
326 an opioid overdose death being fentanyl-detected. Second, we primarily used injury addresses  
327 for the geographic locales and used residential or death addresses only when injury address  
328 was missing, which may lead to geographical misclassification. However, most deaths occurred  
329 within person's own residence so that the injury and residential addresses were the same.  
330 Moreover, death addresses were often in the hospital near the injury place. Therefore, we  
331 expect that the influence of geographic misclassification on our study findings was minimal.  
332 Lastly, while we investigated the spatiotemporal trends of fentanyl-detected overdose deaths,  
333 we did not explore the trends of overdose deaths that involved both fentanyl and other  
334 substances such as methamphetamine. Further studies are needed to investigate the  
335 spatiotemporal trends of polysubstance use with fentanyl in Connecticut.

336

337 In conclusion, given the high probability of an overdose death being fentanyl-detected, more  
338 research should be devoted to exploring the social determinants and supply-side drivers of



339 fentanyl-involved overdose deaths in order to better inform future harm reduction services and  
340 policies to halt the current opioid crisis.

341

342

343 **REFERENCES:**

- 344 1. Ciccarone D. The triple wave epidemic: Supply and demand drivers of the US opioid  
345 overdose crisis. *Int J Drug Policy*. 2019;71:183-188. doi:10.1016/j.drugpo.2019.01.010
- 346 2. Dasgupta N, Beletsky L, Ciccarone D. Opioid Crisis: No Easy Fix to Its Social and Economic  
347 Determinants. *Am J Public Health*. 2018;108(2):182-186. doi:10.2105/AJPH.2017.304187
- 348 3. Zoorob M. Fentanyl shock: The changing geography of overdose in the United States. *Int*  
349 *J Drug Policy*. 2019;70:40-46. doi:10.1016/j.drugpo.2019.04.010
- 350 4. Suzuki J, El-Haddad S. A review: Fentanyl and non-pharmaceutical fentanyls. *Drug Alcohol*  
351 *Depend*. 2017;171:107-116. doi:10.1016/j.drugalcdep.2016.11.033
- 352 5. Prekupec MP, Mansky PA, Baumann MH. Misuse of Novel Synthetic Opioids: A Deadly  
353 New Trend. *J Addict Med*. 2017;11(4):256-265. doi:10.1097/ADM.0000000000000324
- 354 6. Division USDEADC. National Forensic Laboratory Information System: 2014 Annual  
355 Report. Published online 2014.
- 356 7. U.S. Drug Enforcement Administration Diversion Control Division. National Forensic  
357 Laboratory Information System:NFLIS-Drug 2019 Annual Report. Published online 2019.  
358 [https://www.nflis.deadiversion.usdoj.gov/DesktopModules/ReportDownloads/Reports/](https://www.nflis.deadiversion.usdoj.gov/DesktopModules/ReportDownloads/Reports/NFLIS-Drug-AR2019.pdf)  
359 [NFLIS-Drug-AR2019.pdf](https://www.nflis.deadiversion.usdoj.gov/DesktopModules/ReportDownloads/Reports/NFLIS-Drug-AR2019.pdf)
- 360 8. Spencer MR, Warner M, Bastian BA, et al. Drug Overdose Deaths Involving Fentanyl,  
361 2011-2016. *Natl Vital Stat Reports*. 2018;68(3).  
362 [https://stacks.cdc.gov/view/cdc/77832%0Ahttps://www.cdc.gov/nchs/products/index.ht](https://stacks.cdc.gov/view/cdc/77832%0Ahttps://www.cdc.gov/nchs/products/index.htm)  
363 [m.](https://stacks.cdc.gov/view/cdc/77832%0Ahttps://www.cdc.gov/nchs/products/index.htm)
- 364 9. Rudd RA, Seth P, David F, Scholl L. Increases in Drug and Opioid-Involved Overdose

- 365 Deaths — United States. *Morb Mortal Wkly Rep.* 2016;65:1445-1452.
- 366 10. Hedegaard H, Miniño AM, Warner M. Drug Overdose Deaths in the United States, 1999-  
367 2018. *NCHS Data Brief.* 2020;356.
- 368 11. Mattson CL, Tanz LJ, Quinn K, Kariisa M, Patel P, Davis NL. Morbidity and Mortality  
369 Weekly Report Trends and Geographic Patterns in Drug and Synthetic Opioid Overdose  
370 Deaths-United States, 2013-2019. *Morb Mortal Wkly Rep.* 2021;70(6):202-207.  
371 <https://www.cdc.gov/nchs/data/nvsr/nvsr61/>
- 372 12. Gladden RM, O'Donnell J, Mattson CL, Seth P. Changes in Opioid-Involved Overdose  
373 Deaths by Opioid Type and Presence of Benzodiazepines, Cocaine, and  
374 Methamphetamine — 25 States, July–December 2017 to January–June 2018. *MMWR*  
375 *Morb Mortal Wkly Rep.* 2019;68(34):737-744. doi:10.15585/mmwr.mm6834a2
- 376 13. Marshall BDL, Krieger MS, Yedinak JL, et al. Epidemiology of fentanyl-involved drug  
377 overdose deaths: A geospatial retrospective study in Rhode Island, USA. *Int J Drug Policy.*  
378 2017;46:130-135. doi:10.1016/j.drugpo.2017.05.029
- 379 14. Nesoff ED, Branas CC, Martins SS. The geographic distribution of fentanyl-involved  
380 overdose deaths in Cook County, Illinois. *Am J Public Health.* 2020;110(1):98-105.  
381 doi:10.2105/AJPH.2019.305368
- 382 15. Rhee TG, Ross JS, Rosenheck RA, Grau LE, Fiellin DA, Becker WC. Accidental drug  
383 overdose deaths in Connecticut, 2012–2018: The rise of polysubstance detection? *Drug*  
384 *Alcohol Depend.* 2019;205(September):107671. doi:10.1016/j.drugalcdep.2019.107671
- 385 16. Green TC, Grau LE, Carver HW, Kinzly M, Heimer R. Epidemiologic trends and geographic  
386 patterns of fatal opioid intoxications in Connecticut, USA: 1997-2007. *Drug Alcohol*

- 387            *Depend.* 2011;115(3):221-228. doi:10.1016/j.drugalcdep.2010.11.007
- 388    17.    Cambon J. Package 'tidygeocoder.' CRAN. Published online 2021:2-13.
- 389    18.    Bureau UC. American Community Survey Data. [https://www.census.gov/programs-](https://www.census.gov/programs-surveys/acs/data.html)
- 390            [surveys/acs/data.html](https://www.census.gov/programs-surveys/acs/data.html)
- 391    19.    Besag J, York J, Mollié A. Bayesian image restoration, with two applications in spatial
- 392            statistics. *Ann Inst Stat Math.* Published online 1991. doi:10.1007/BF00116466
- 393    20.    Simpson D, Rue H, Riebler A, Martins TG, Sørbye SH. Penalising model component
- 394            complexity: A principled, practical approach to constructing priors. *Stat Sci.* 2017;32(1):1-
- 395            28. doi:10.1214/16-STS576
- 396    21.    Riebler A, Sørbye SH, Simpson D, et al. An intuitive Bayesian spatial model for disease
- 397            mapping that accounts for scaling. *Stat Methods Med Res.* 2016;25(4):1145-1165.
- 398            doi:10.1177/0962280216660421
- 399    22.    Lawson AB. *Bayesian Disease Mapping: Hierarchical Modeling in Spatial Epidemiology,*
- 400            *3rd Edition.*; 2018.
- 401    23.    Rue H, Martino S. Approximate Bayesian inference for latent Gaussian models by using
- 402            integrated nested Laplace approximations. *J R Stat Soc Ser B Stat Methodol.*
- 403            2009;71(2):319-392.
- 404    24.    Rue H, Riebler A, Sørbye SH, Illian JB, Simpson DP, Lindgren FK. Bayesian computing with
- 405            INLA: A review. *Annu Rev Stat Its Appl.* 2017;4:395-421. doi:10.1146/annurev-statistics-
- 406            060116-054045
- 407    25.    Blangiardo M, Cameletti M, Baio G, Rue H. Spatial and spatio-temporal models with R-
- 408            INLA. *Spat Spatiotemporal Epidemiol.* 2013;7:39-55. doi:10.1016/j.sste.2013.07.003

- 409 26. Larochelle MR, Slavova S, Root ED, et al. Disparities in Opioid Overdose Death Trends by  
410 Race/Ethnicity, 2018-2019, from the HEALing Communities Study. *Am J Public Health*.  
411 2021;111(10):1851-1854. doi:10.2105/AJPH.2021.306431
- 412 27. Lippold KM, Jones CM, Olsen EO, Giroir BP. Racial/Ethnic and Age Group Differences in  
413 Opioid and Synthetic Opioid–Involved Overdose Deaths Among Adults Aged ≥18 Years in  
414 Metropolitan Areas — United States, 2015–2017. *MMWR Morb Mortal Wkly Rep*.  
415 2019;68(43):967-973. doi:10.15585/mmwr.mm6843a3
- 416 28. Townsend T, Kline D, Rivera-Aguirre A, et al. Racial/Ethnic and Geographic Trends in  
417 Combined Stimulant/Opioid Overdoses, 2007–2019. *Am J Epidemiol*. 2022;191(4):599-  
418 612. doi:10.1093/aje/kwab290
- 419 29. R.M. G, P. M, P. S. Fentanyl Law Enforcement Submissions and Increases in Synthetic  
420 Opioid-Involved Overdose Deaths - 27 States, 2013-2014. *MMWR Morb Mortal Wkly*  
421 *Rep*. 2016;65(33):837-843.  
422 [http://www.embase.com/search/results?subaction=viewrecord&from=export&id=L6164](http://www.embase.com/search/results?subaction=viewrecord&from=export&id=L616449279%0Ahttp://dx.doi.org/10.15585/mmwr.mm6533a2)  
423 [49279%0Ahttp://dx.doi.org/10.15585/mmwr.mm6533a2](http://dx.doi.org/10.15585/mmwr.mm6533a2)
- 424 30. Hu K, Klinkenberg B, Gan WQ, Slaunwhite AK. Spatial-temporal trends in the risk of illicit  
425 drug toxicity death in British Columbia. *BMC Public Health*. 2022;22(1):1-11.  
426 doi:10.1186/s12889-022-14586-8  
427

428 Table 1. Characteristics of fentanyl-detected overdose deaths among Connecticut residents, 2009-2019

|                                     | Fentanyl-detected<br>Overdose deaths | Non-fentanyl<br>Overdose deaths | Total sample |
|-------------------------------------|--------------------------------------|---------------------------------|--------------|
|                                     | n=3234                               | n=3398                          | n=6632       |
| Age at death (years), No. (%)       |                                      |                                 |              |
| <25                                 | 260 (8.0)                            | 287 (8.4)                       | 547 (8.2)    |
| 25-34                               | 879 (27.2)                           | 775 (22.8)                      | 1654 (24.9)  |
| 35-44                               | 854 (26.4)                           | 785 (23.1)                      | 1639 (24.7)  |
| 45-54                               | 718 (22.2)                           | 923 (27.2)                      | 1641 (24.7)  |
| 55-64                               | 461 (14.3)                           | 533 (15.7)                      | 994 (15.0)   |
| 65+                                 | 62 (1.9)                             | 95 (2.8)                        | 157 (2.4)    |
| Female, No. (%)                     | 697 (21.6)                           | 1025 (30.2)                     | 1722 (26.0)  |
| Race/ethnicity, No. (%)             |                                      |                                 |              |
| White, non-Hispanic                 | 2445 (75.6)                          | 2823 (83.1)                     | 5268 (79.4)  |
| Black, non-Hispanic                 | 293 (9.1)                            | 197 (5.8)                       | 490 (7.4)    |
| Hispanic                            | 445 (13.8)                           | 338 (9.9)                       | 783 (11.8)   |
| Other <sup>a</sup>                  | 51 (1.6)                             | 40 (1.2)                        | 91 (1.4)     |
| Substance present, No. (%)          |                                      |                                 |              |
| Heroin/morphine                     | 1430 (44.3)                          | 2000 (61.0)                     | 3430 (51.7)  |
| Pharmaceutical opioids <sup>b</sup> | 320 (9.9)                            | 990 (29.1)                      | 1310 (19.8)  |
| Methadone                           | 202 (6.2)                            | 573 (16.9)                      | 775 (11.7)   |
| Buprenorphine                       | 72 (2.2)                             | 92 (2.7)                        | 164 (2.5)    |
| Benzodiazepine                      | 897 (27.7)                           | 1276 (37.6)                     | 2173 (32.8)  |
| Cocaine                             | 1265 (39.1)                          | 773 (22.7)                      | 2038 (30.7)  |
| Ethanol                             | 951 (29.4)                           | 1032 (30.4)                     | 1983 (29.9)  |
| Amphetamine                         | 141 (4.4)                            | 105 (3.1)                       | 246 (3.7)    |
| Xylazine                            | 73 (2.3)                             | 1 (0.0)                         | 74 (1.1)     |
| Gabapentin                          | 241 (7.5)                            | 125 (3.7)                       | 366 (5.5)    |
| Mitragynine                         | 31 (1.0)                             | 10 (0.3)                        | 41 (0.6)     |

429 <sup>a</sup> Other includes Asian, American Indian, bi-racial, or other racial/ethnic groups

430 <sup>b</sup> Pharmaceutical opioids include di-H-codeine, hydromorphone, hydrocodone, oxycodone, and tramadol, but  
 431 do not include methadone and buprenorphine

432 Figure 1. Monthly temporal trend fentanyl-detected overdose deaths among Connecticut residents, 2009-2019. This stacked figure  
433 shows, as the number of overdose deaths increased, the share of overdose deaths involving fentanyl increased as well.  
434  
435

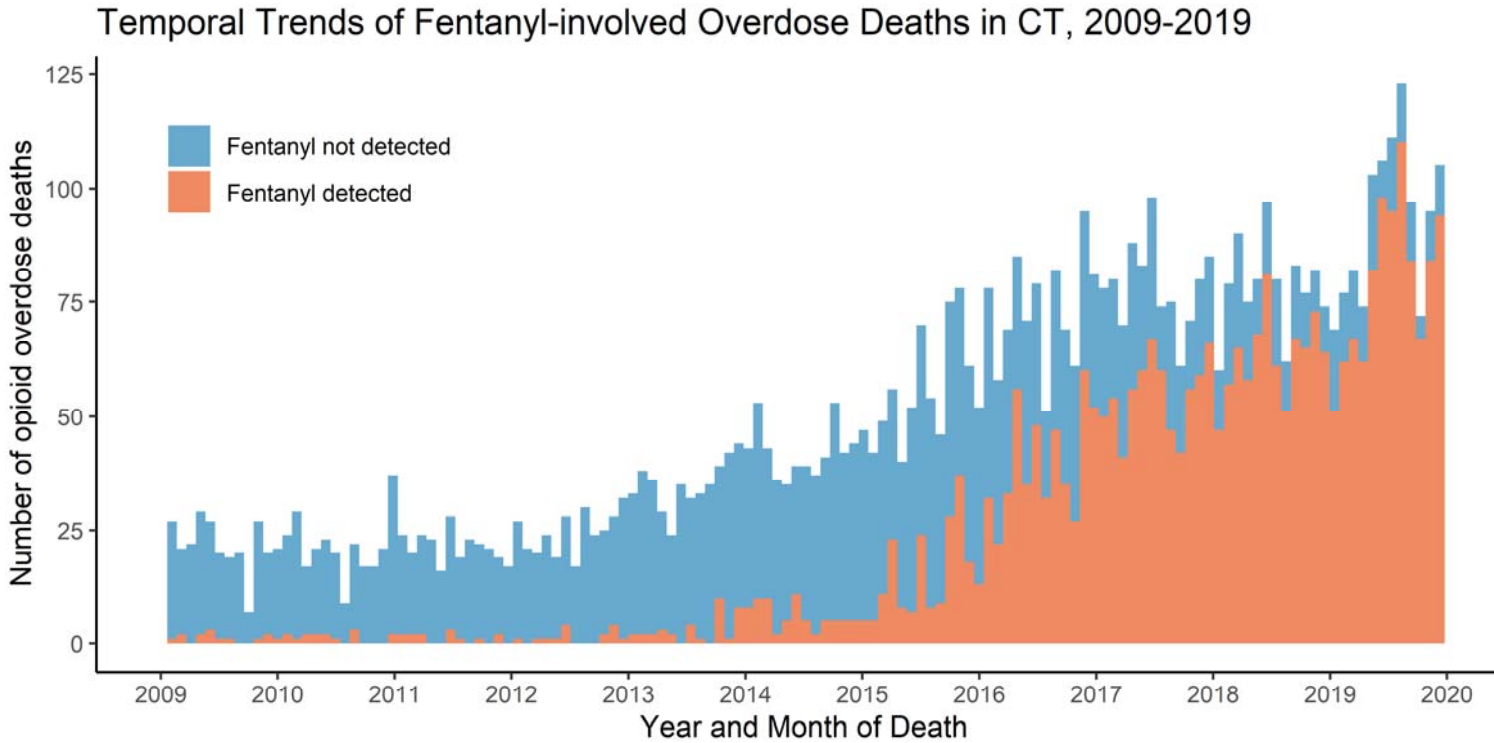

436  
437

438 Figure 2: Posterior distributions of estimated parameters for spatial ( $\alpha_i$ ) and temporal ( $\gamma_t$ ) random effects (relative risk) from the  
 439 Bayesian space-time Poisson model for overall opioid-detected overdose deaths. The left panel depicts the spatial patterns of overall  
 440 opioid-detected overdose deaths when holding temporal terms and other covariates constant. The right panel depicts the temporal  
 441 patterns of overall opioid-detected overdose deaths when holding spatial terms and other covariates constant. The random effects  
 442 were exponentiated. Larger values of relative risk indicate the higher risk of opioid-detected overdose deaths at town level in  
 443 Connecticut. Note: link to the Connecticut Towns Index Map (<https://portal.ct.gov/-/media/DEEP/gis/Resources/IndexTowns.pdf>)

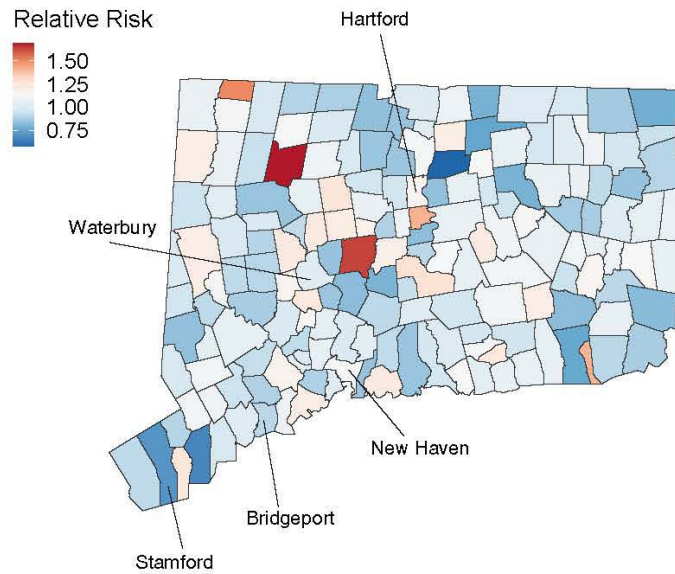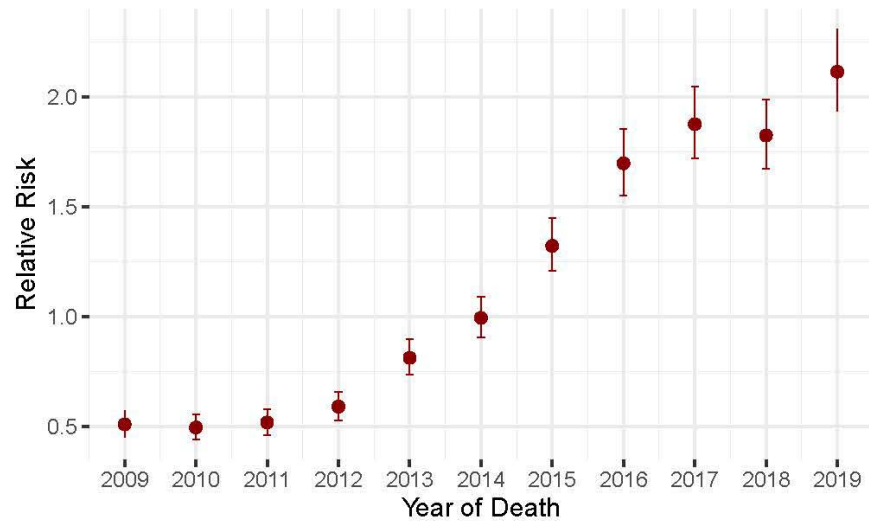

444



445 Figure 3. Summary of the posterior means and 95% credible intervals (CrIs) of the fixed effect coefficients of covariates. The  
 446 regression coefficients are exponentiated to represent exponentiated coefficients from binomial logistic regression.

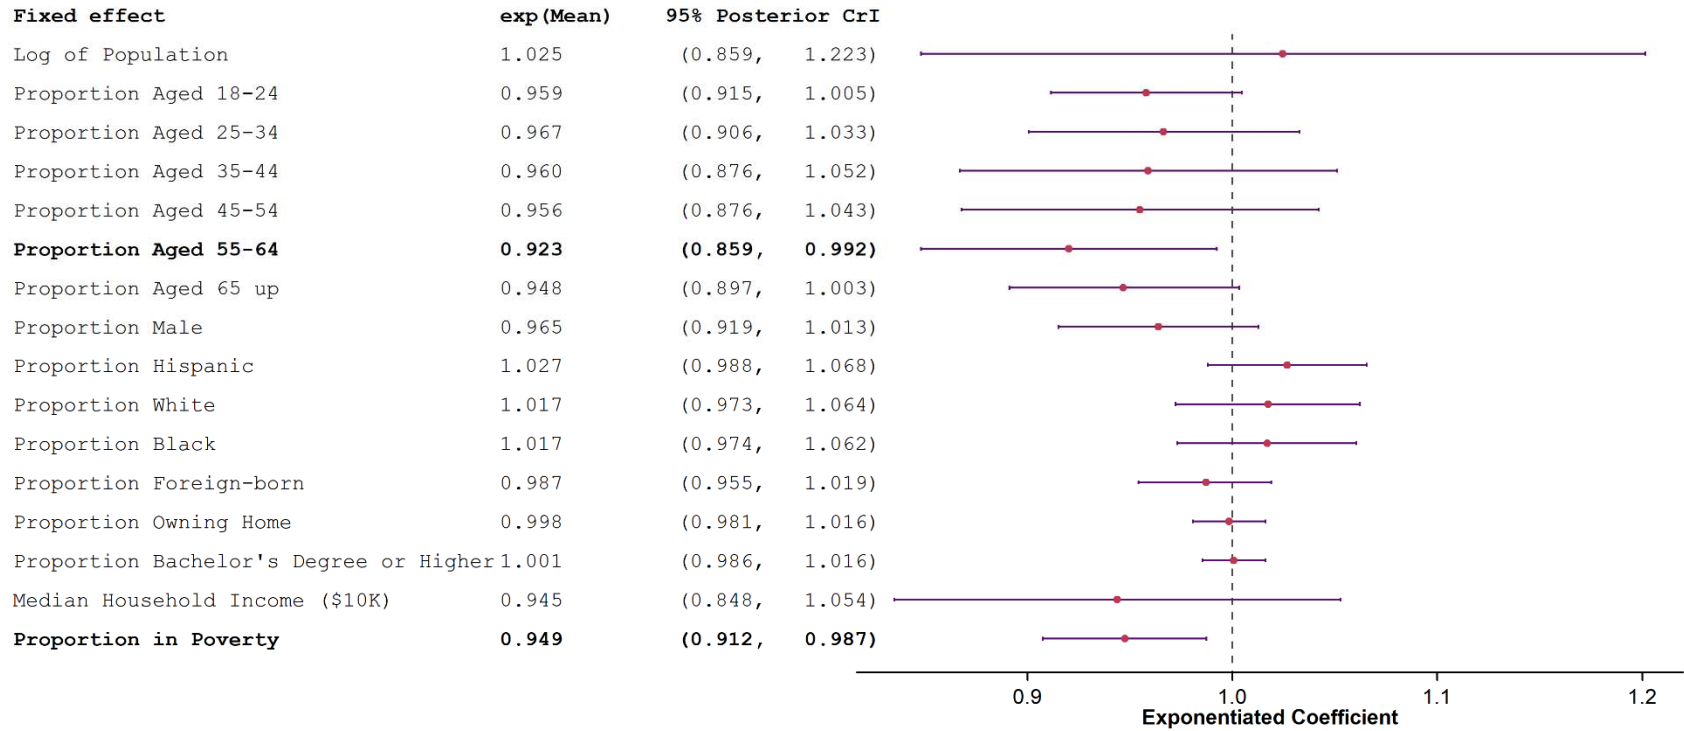

447  
 448

449 Figure 4: Posterior distributions of estimated parameters for spatial ( $\mu_i$ ) and temporal ( $\varphi_t$ ) random effects from the Bayesian space-  
 450 time binomial model for fentanyl-detected overdose deaths. The left panel depicts the spatial patterns of fentanyl-detected  
 451 overdose deaths when holding temporal terms and other covariates constant. The right panel depicts the temporal patterns of  
 452 fentanyl-detected overdose deaths when holding spatial terms and other covariates constant. The random effects were  
 453 exponentiated. Larger values of exponentiated coefficients indicate the higher probability being fentanyl detected given an opioid  
 454 overdose death at town level in Connecticut. Note: link to the Connecticut Towns Index Map ([https://portal.ct.gov/-](https://portal.ct.gov/-/media/DEEP/gis/Resources/IndexTownspdf.pdf)  
 455 [/media/DEEP/gis/Resources/IndexTownspdf.pdf](https://portal.ct.gov/-/media/DEEP/gis/Resources/IndexTownspdf.pdf))

Exponentiated  
Coefficients

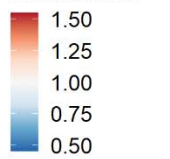
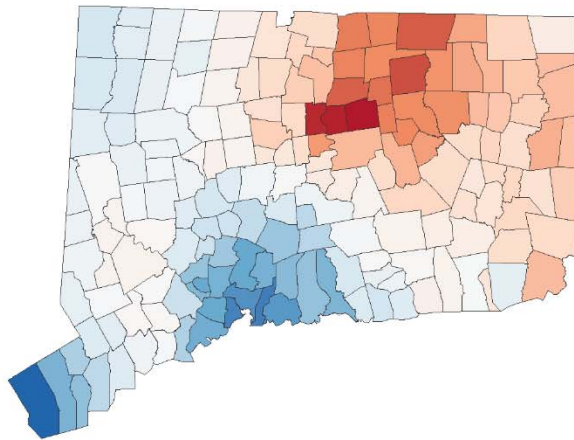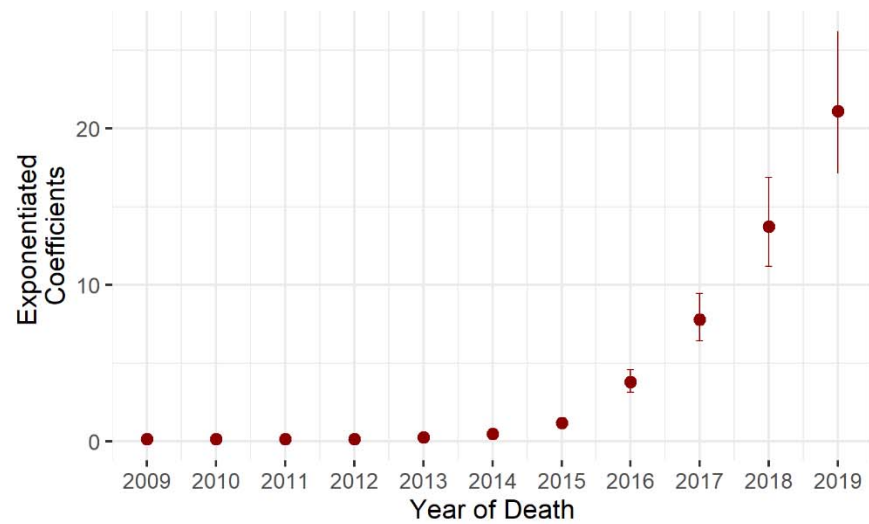

456  
457

458 Figure 5. The predicted probability of an overdose death being fentanyl-detected from the Bayesian space-time binomial model,  
459 stratified by town and calendar year, Connecticut. Color scales differ by year to show the distribution within each year. Note: link to  
460 the Connecticut Towns Index Map (<https://portal.ct.gov/-/media/DEEP/gis/Resources/IndexTownspdf.pdf>)

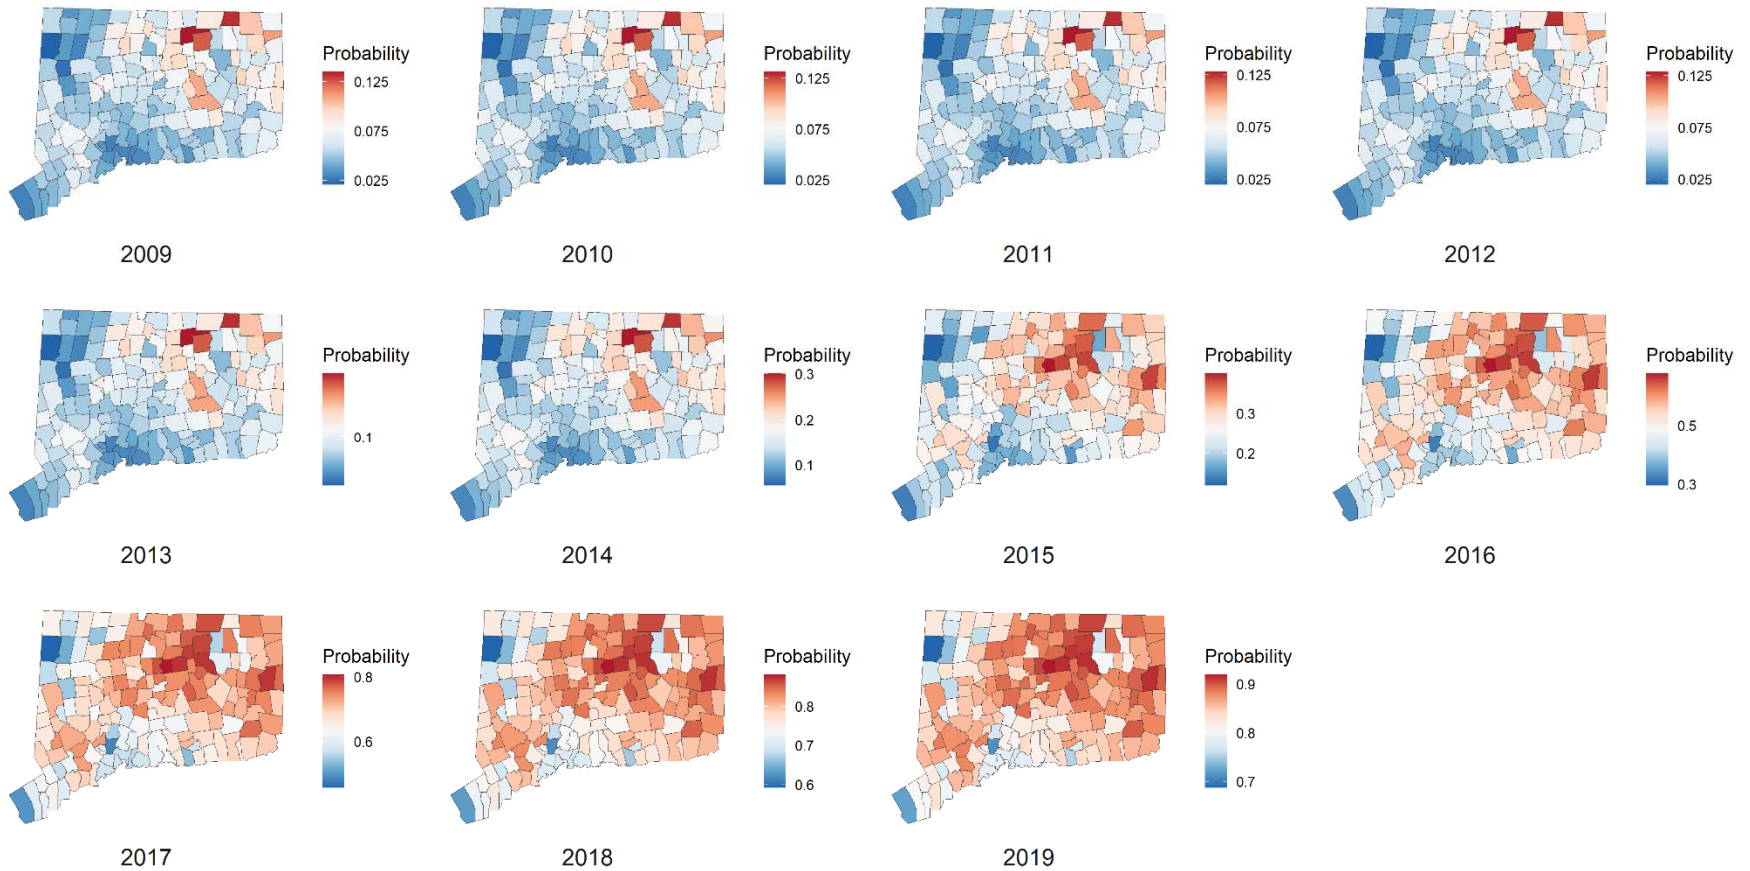

461  
462

463 **Appendix**

464 **Appendix S1**

465 **Priors on random effects in Bayesian space-time Poisson model for overall opioid-detected overdose deaths**

$$\log(\lambda_{it}) = \mathbf{x}_{it}^T \boldsymbol{\beta} + \alpha_i + \gamma_t + \delta_{it} + \log(\text{pop}_n)$$

$$\alpha_i = u_i + v_i, \quad u_i \sim N(0, \tau_u^{-1} Q^-), \quad v_i \sim N(0, \tau_v^{-1} I)$$

$$\gamma_t = \Delta\pi_i + \rho_t, \quad \Delta\pi_i = \pi_i - \pi_{i-1} \sim N(0, \tau_\pi^{-1}), \quad \rho_t \sim N(0, \tau_\rho^{-1} I),$$

466 where  $u_i \sim N(0, \tau_u^{-1} Q)$  represents the spatial structured random effect and is modeled under the class of intrinsic Gaussian Markov  
467 random fields models.  $Q$  denotes the precision matrix (neighboring matrix), and  $Q^-$  is the generalized inverse of the matrix  $Q$ . The  
468 marginal variances are  $\tau_u^{-1} [Q^-]_{ii}$ , which are dependent on the matrix  $Q$ .  $v_i \sim N(0, \tau_v^{-1} I)$  is the spatial unstructured random effect  
469 and  $\tau_v^{-1}$  is the marginal variance. Gamma priors with small rate parameters are commonly assigned to  $\tau_u$  and  $\tau_v$ . Here, Gamma(1,  
470 0.0005) is considered.

471

472  $\Delta\pi_i = \pi_i - \pi_{i-1} \sim N(0, \tau_\pi^{-1})$  is first order random walk temporal random effect defined as a random step at each point in time ( $\Delta\pi_i$ ).  
473 All random steps are independent and identically distributed.  $\rho_t \sim N(0, \tau_\rho^{-1} I)$  is the temporal unstructured random effect and  $\tau_\rho^{-1}$  is  
474 the marginal variance. Gamma priors with small rate parameters are commonly assigned to  $\tau_\pi$  and  $\tau_\rho$ . Here, Gamma(1, 0.0005) is  
475 considered.

476

477 **Appendix S2: Model Comparison**

478 **Appendix S2.1: Model Comparison for overall opioid-detected overdose deaths**

479 For overall opioid-detected overdose deaths, Poisson models were used to estimate the mean number of opioid-detected overdose  
 480 deaths in each town at each year from 2009-2019. Concerning some towns with 0 opioid-detected overdose deaths, zero-inflated  
 481 Poisson models were also examined. Deviance information criterion (DIC) and Watanabe-Akaike information criterion were used to  
 482 compare Poisson model and zero-inflated Poisson model.

483  
 484 Appendix S2. Table 1: Model Comparison for overall opioid-detected overdose deaths

| Model                      | DIC     | WAIC    |
|----------------------------|---------|---------|
| Poisson (in the main text) | 5726.50 | 5733.06 |
| Zero-inflated Poisson      | 6525.00 | 6528.64 |

485  
 486 Based on DIC and WAIC, Poisson model is selected.

487  
 488 **Appendix S2.2: Model Comparison for fentanyl-detected overdose deaths**

489 For fentanyl-detected overdose death among all opioid-detected overdose deaths, binomial model and logistic regression were used  
 490 to estimate the probability being fentanyl-detected given an opioid overdose death in each town at each year from 2009-2019.  
 491 Several parsimonious models, in addition to the logistic model mentioned in the main text were examined. DIC and WAIC were used  
 492 for model comparison.

493  
 494 Appendix S2. Table 2: Model Comparison for fentanyl-detected overdose deaths

| Model                                                                                                                                        | DIC     | WAIC    |
|----------------------------------------------------------------------------------------------------------------------------------------------|---------|---------|
| Conditional autoregressive term at town level + linear calendar year + unstructured temporal term for calendar year + demographic covariates | 2175.64 | 2182.10 |
| Conditional autoregressive term at town level + first-order random walk structured temporal term for calendar year + demographic covariates  | 2172.43 | 2178.53 |
| Conditional autoregressive term at town                                                                                                      | 2172.51 | 2178.61 |

|                                                                                                                                                                                                                                                             |         |         |
|-------------------------------------------------------------------------------------------------------------------------------------------------------------------------------------------------------------------------------------------------------------|---------|---------|
| level + first-order random walk structured temporal term for calendar year + unstructured temporal term for calendar year + demographic covariates                                                                                                          |         |         |
| Conditional autoregressive term at town level + first-order random walk structured temporal term for calendar year + space-time interaction term + demographic covariates                                                                                   | 2172.39 | 2178.49 |
| Conditional autoregressive term at town level + first-order random walk structured temporal term for calendar year + unstructured temporal term for calendar year + space-time interaction term + demographic covariates (model specified in the main text) | 2172.44 | 2178.53 |

495  
 496 Based on DIC and WAIC, the binomial model including conditional autoregressive term at town level, first-order random walk  
 497 structured temporal term for calendar year, space-time interaction term, and demographic covariates, without unstructured  
 498 temporal term, was selected.  
 499

500 **Appendix S3**

501 **Sensitivity analysis using penalized complexity (PC) priors for Bayesian space-time Poisson model for overall opioid-detected**  
502 **overdose deaths**

503 In this sensitivity analysis, instead of using gamma priors for precision hyperparameters in Bayesian space-time Poisson model for  
504 overall opioid-detected overdose deaths, we employed penalized complexity (PC)<sup>1</sup> priors for the prior distribution of  
505 hyperparameters. The hyperprior distributions are chosen with the PC framework.<sup>2</sup> We let the precision parameters  $\tau_w$ ,  $\tau_v$ ,  $\tau_\pi$  and  $\tau_\rho$   
506 (as described in Appendix S1)  $\sim PC(0.2/0.31, 0.01)$ , which corresponds to  $Pr(1/\sqrt{\tau} > 0.2/0.31) = 0.01$ , leading to the prior  
507 standard deviation of the marginal log relative risk being 0.2. The results of this sensitivity analysis were shown in Appendix S3  
508 Figure 1.

509

510 References:

- 511 1. Simpson D, Rue H, Riebler A, Martins TG, Sørbye SH. Penalising model component complexity: A principled, practical approach to  
512 constructing priors. Stat Sci. 2017;32(1):1-28.
- 513 2. Riebler A, Sørbye SH, Simpson D, et al. An intuitive Bayesian spatial model for disease mapping that accounts for scaling. Stat  
514 Methods Med Res. 2016;25(4):1145-1165.

515 Appendix S3. Figure 1: Posterior distributions of estimated parameters for spatial ( $\alpha_i$ ) and temporal ( $\gamma_t$ ) random effects (relative  
 516 risk) from the Bayesian space-time Poisson model for overall opioid-detected overdose deaths using penalized complexity priors for  
 517 hyperparameters. The left panel depicts the spatial patterns of overall opioid-detected overdose deaths when holding temporal  
 518 terms and other covariates constant. The right panel depicts the temporal patterns of overall opioid-detected overdose deaths when  
 519 holding spatial terms and other covariates constant. The random effects were exponentiated. Larger values of relative risk indicate  
 520 the higher risk of opioid-detected overdose deaths at town level in Connecticut. Note: link to the Connecticut Towns Index Map  
 521 (<https://portal.ct.gov/-/media/DEEP/gis/Resources/IndexTownspdf.pdf>)

Relative Risk

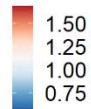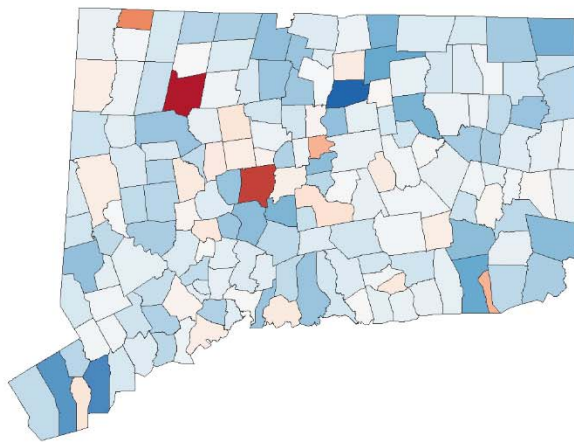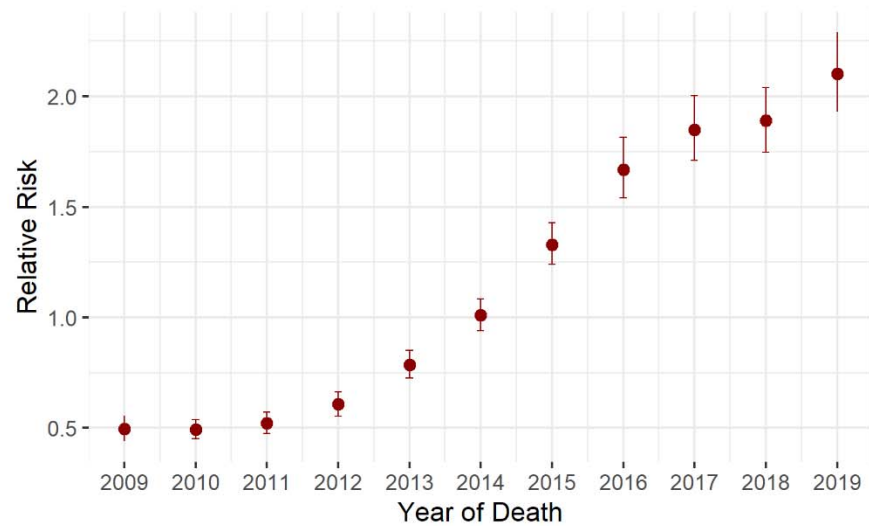

522  
523  
524



525 **Appendix S4**526 **Appendix S4. Table 1. Characteristics of opioid-detected overdose deaths among Connecticut residents by year, 2009-2019**

| Year                                | 2009       | 2010       | 2011       | 2012       | 2013       | 2014       | 2015       | 2016       | 2017       | 2018       | 2019       |
|-------------------------------------|------------|------------|------------|------------|------------|------------|------------|------------|------------|------------|------------|
|                                     | n=266      | n=254      | n=268      | n=298      | n=429      | n=510      | n=678      | n=883      | n=960      | n=949      | n=1138     |
| Age at death (years), No. (%)       |            |            |            |            |            |            |            |            |            |            |            |
| <25                                 | 28 (10.5)  | 26 (10.2)  | 39 (14.6)  | 39 (13.1)  | 48 (11.2)  | 31 (6.1)   | 60 (8.8)   | 65 (7.4)   | 79 (8.2)   | 68 (7.2)   | 64 (5.6)   |
| 25-34                               | 62 (23.3)  | 45 (17.7)  | 75 (28.1)  | 74 (24.8)  | 106 (24.7) | 131 (25.7) | 167 (24.6) | 233 (26.4) | 264 (27.5) | 226 (23.8) | 271 (23.8) |
| 35-44                               | 81 (30.5)  | 72 (28.3)  | 58 (21.7)  | 60 (20.1)  | 95 (22.1)  | 132 (25.9) | 146 (21.5) | 200 (22.7) | 239 (24.9) | 248 (26.1) | 308 (27.1) |
| 45-54                               | 64 (24.1)  | 91 (35.8)  | 64 (24.0)  | 87 (29.2)  | 113 (26.3) | 142 (27.8) | 173 (25.5) | 225 (25.5) | 213 (22.2) | 229 (24.1) | 240 (21.1) |
| 55-64                               | 29 (10.9)  | 20 (7.9)   | 30 (11.2)  | 30 (10.1)  | 62 (14.5)  | 59 (11.6)  | 110 (16.2) | 144 (16.3) | 148 (15.4) | 148 (15.6) | 214 (18.8) |
| ≥65                                 | 2 (0.8)    | 0 (0.0)    | 1 (0.4)    | 8 (2.7)    | 5 (1.2)    | 15 (2.9)   | 22 (3.2)   | 16 (1.8)   | 17 (1.8)   | 30 (3.2)   | 41 (3.6)   |
| Female, No. (%)                     | 83 (31.2)  | 79 (31.1)  | 76 (28.5)  | 80 (26.8)  | 127 (29.6) | 154 (30.2) | 178 (26.3) | 228 (25.8) | 232 (24.2) | 222 (23.4) | 263 (23.1) |
| Race/ethnicity, No. (%)             |            |            |            |            |            |            |            |            |            |            |            |
| White, non-Hispanic                 | 228 (85.7) | 214 (84.3) | 236 (88.4) | 245 (82.2) | 357 (83.2) | 430 (84.3) | 562 (82.9) | 696 (78.8) | 764 (79.6) | 710 (74.8) | 826 (72.6) |
| Black, non-Hispanic                 | 12 (4.5)   | 13 (5.1)   | 9 (3.4)    | 20 (6.7)   | 26 (6.1)   | 21 (4.1)   | 36 (5.3)   | 64 (7.2)   | 72 (7.5)   | 94 (9.9)   | 123 (10.8) |
| Hispanic                            | 25 (9.4)   | 26 (10.2)  | 20 (7.5)   | 28 (9.4)   | 42 (9.8)   | 56 (11.0)  | 74 (10.9)  | 102 (11.6) | 111 (11.6) | 127 (13.4) | 172 (15.1) |
| Other <sup>a</sup>                  | 1 (0.4)    | 1 (0.4)    | 2 (0.7)    | 5 (1.7)    | 4 (0.9)    | 3 (0.6)    | 6 (0.9)    | 21 (2.4)   | 13 (1.4)   | 18 (1.9)   | 17 (1.5)   |
| Substance present, No. (%)          |            |            |            |            |            |            |            |            |            |            |            |
| Fentanyl/fentanyl analogs           | 15 (5.6)   | 14 (5.5)   | 14 (5.2)   | 15 (5.0)   | 36 (8.4)   | 75 (14.7)  | 183 (27.0) | 472 (53.5) | 670 (69.8) | 763 (80.4) | 977 (85.9) |
| Heroin/morphine                     | 146 (54.9) | 124 (48.8) | 144 (53.9) | 181 (60.7) | 278 (64.8) | 335 (65.7) | 432 (63.7) | 522 (59.1) | 463 (48.2) | 399 (42.0) | 406 (35.7) |
| Pharmaceutical opioids <sup>b</sup> | 96 (36.1)  | 96 (37.8)  | 80 (30.0)  | 81 (27.2)  | 108 (25.2) | 142 (27.8) | 162 (23.9) | 155 (17.6) | 149 (15.5) | 107 (11.3) | 134 (11.8) |
| Methadone                           | 66 (24.8)  | 58 (22.8)  | 55 (20.6)  | 37 (12.4)  | 48 (11.2)  | 54 (10.6)  | 81 (11.9)  | 96 (10.9)  | 100 (10.4) | 84 (8.9)   | 96 (8.4)   |
| Buprenorphine                       | 0 (0.0)    | 0 (0.0)    | 0 (0.0)    | 0 (0.0)    | 7 (1.6)    | 9 (1.8)    | 21 (3.1)   | 30 (3.4)   | 25 (2.6)   | 29 (3.1)   | 43 (3.8)   |
| Benzodiazepine                      | 62 (23.3)  | 84 (33.1)  | 93 (34.8)  | 48 (16.1)  | 131 (30.5) | 225 (44.1) | 285 (42.0) | 304 (34.4) | 345 (35.9) | 284 (29.9) | 312 (27.4) |
| Cocaine                             | 38 (14.3)  | 34 (13.4)  | 64 (24.0)  | 67 (22.5)  | 113 (26.3) | 118 (23.1) | 162 (23.9) | 263 (29.8) | 333 (34.7) | 365 (38.5) | 481 (42.3) |
| Ethanol                             | 69 (25.9)  | 76 (29.9)  | 87 (32.6)  | 60 (20.1)  | 114 (26.6) | 155 (30.4) | 188 (27.7) | 274 (31.0) | 321 (33.4) | 274 (28.9) | 365 (32.1) |
| Amphetamine                         | 1 (0.4)    | 1 (0.4)    | 3 (1.1)    | 5 (1.7)    | 5 (1.2)    | 22 (4.3)   | 35 (5.2)   | 29 (3.3)   | 35 (3.6)   | 48 (5.1)   | 62 (5.4)   |
| Xylazine                            | 0 (0.0)    | 0 (0.0)    | 0 (0.0)    | 0 (0.0)    | 0 (0.0)    | 0 (0.0)    | 0 (0.0)    | 0 (0.0)    | 0 (0.0)    | 0 (0.0)    | 74 (6.5)   |
| Gabapentin                          | 0 (0.0)    | 0 (0.0)    | 1 (0.4)    | 0 (0.0)    | 0 (0.0)    | 0 (0.0)    | 2 (0.3)    | 50 (5.7)   | 85 (8.9)   | 77 (8.1)   | 151 (13.3) |
| Mitragynine                         | 0 (0.0)    | 0 (0.0)    | 0 (0.0)    | 0 (0.0)    | 0 (0.0)    | 1 (0.2)    | 0 (0.0)    | 8 (0.9)    | 3 (0.3)    | 7 (0.7)    | 22 (1.9)   |

<sup>a</sup> Other includes Asian, American Indian, bi-racial, or other racial/ethnic groups

<sup>b</sup> Pharmaceutical opioids include di-H-codeine, hydromorphone, hydrocodone, oxycodone, and tramadol, but do not include methadone and buprenorphine

527  
528  
529

530 **Appendix S4. Table 2. Characteristics of fentanyl-detected overdose deaths among Connecticut residents by year, 2009-2019**

| Year                                | 2009      | 2010      | 2011      | 2012      | 2013      | 2014      | 2015       | 2016       | 2017       | 2018       | 2019       |
|-------------------------------------|-----------|-----------|-----------|-----------|-----------|-----------|------------|------------|------------|------------|------------|
|                                     | n=266     | n=254     | n=268     | n=298     | n=429     | n=510     | n=678      | n=883      | n=960      | n=949      | n=1138     |
| Age at death (years), No. (%)       |           |           |           |           |           |           |            |            |            |            |            |
| <25                                 | 2 (13.3)  | 1 (7.1)   | 4 (28.6)  | 1 (6.7)   | 2 (5.6)   | 7 (9.3)   | 19 (10.4)  | 35 (7.4)   | 64 (9.6)   | 63 (8.3)   | 62 (6.3)   |
| 25-34                               | 3 (20.0)  | 4 (28.6)  | 4 (28.6)  | 3 (20.0)  | 6 (16.7)  | 21 (28.0) | 50 (27.3)  | 136 (28.8) | 209 (31.2) | 195 (25.6) | 248 (25.4) |
| 35-44                               | 2 (13.3)  | 2 (14.3)  | 3 (21.4)  | 1 (6.7)   | 8 (22.2)  | 25 (33.3) | 43 (23.5)  | 122 (25.8) | 175 (26.1) | 201 (26.3) | 272 (27.8) |
| 45-54                               | 4 (26.7)  | 6 (42.9)  | 1 (7.1)   | 6 (40.0)  | 12 (33.3) | 16 (21.3) | 47 (25.7)  | 111 (23.5) | 138 (20.6) | 177 (23.2) | 200 (20.5) |
| 55-64                               | 4 (26.7)  | 1 (7.1)   | 2 (14.3)  | 3 (20.0)  | 8 (22.2)  | 4 (5.3)   | 22 (12.0)  | 61 (12.9)  | 79 (11.8)  | 110 (14.4) | 167 (17.1) |
| ≥65                                 | 0 (0.0)   | 0 (0.0)   | 0 (0.0)   | 1 (6.7)   | 0 (0.0)   | 2 (2.7)   | 2 (1.1)    | 7 (1.5)    | 5 (0.7)    | 17 (2.2)   | 28 (2.9)   |
| Female, No. (%)                     | 9 (60.0)  | 4 (28.6)  | 4 (28.6)  | 5 (33.3)  | 12 (33.3) | 25 (33.3) | 34 (18.6)  | 94 (19.9)  | 136 (20.3) | 162 (21.2) | 212 (21.7) |
| Race/ethnicity, No. (%)             |           |           |           |           |           |           |            |            |            |            |            |
| White, non-Hispanic                 | 12 (80.0) | 11 (78.6) | 13 (92.9) | 14 (93.3) | 26 (72.2) | 61 (81.3) | 149 (81.4) | 370 (78.4) | 523 (78.1) | 568 (74.4) | 698 (71.4) |
| Black, non-Hispanic                 | 1 (6.7)   | 1 (7.1)   | 0 (0.0)   | 0 (0.0)   | 4 (11.1)  | 4 (5.3)   | 9 (4.9)    | 33 (7.0)   | 55 (8.2)   | 79 (10.4)  | 107 (11.0) |
| Hispanic                            | 2 (13.3)  | 2 (14.3)  | 1 (7.1)   | 1 (6.7)   | 6 (16.7)  | 9 (12.0)  | 23 (12.6)  | 62 (13.1)  | 82 (12.2)  | 101 (13.2) | 156 (16.0) |
| Other <sup>a</sup>                  | 0 (0.0)   | 0 (0.0)   | 0 (0.0)   | 0 (0.0)   | 0 (0.0)   | 1 (1.3)   | 2 (1.1)    | 7 (1.5)    | 10 (1.5)   | 15 (2.0)   | 16 (1.6)   |
| Substance present, No. (%)          |           |           |           |           |           |           |            |            |            |            |            |
| Heroin/morphine                     | 2 (13.3)  | 1 (7.1)   | 2 (14.3)  | 1 (6.7)   | 11 (30.6) | 38 (50.7) | 112 (61.2) | 277 (58.7) | 321 (47.9) | 313 (41.0) | 352 (36.0) |
| Pharmaceutical opioids <sup>b</sup> | 4 (26.7)  | 2 (14.3)  | 4 (28.6)  | 3 (20.0)  | 6 (16.7)  | 14 (18.7) | 25 (13.7)  | 53 (11.2)  | 66 (9.9)   | 60 (7.9)   | 83 (8.5)   |
| Methadone                           | 2 (13.3)  | 2 (14.3)  | 0 (0.0)   | 1 (6.7)   | 3 (8.3)   | 5 (6.7)   | 6 (3.3)    | 33 (7.0)   | 43 (6.4)   | 40 (5.2)   | 67 (6.9)   |
| Buprenorphine                       | 0 (0.0)   | 0 (0.0)   | 0 (0.0)   | 0 (0.0)   | 0 (0.0)   | 1 (1.3)   | 6 (3.3)    | 12 (2.5)   | 10 (1.5)   | 16 (2.1)   | 27 (2.8)   |
| Benzodiazepine                      | 4 (26.7)  | 3 (21.4)  | 4 (28.6)  | 2 (13.3)  | 9 (25.0)  | 23 (30.7) | 56 (30.6)  | 127 (26.9) | 208 (31.0) | 213 (27.9) | 248 (25.4) |
| Cocaine                             | 3 (20.0)  | 2 (14.3)  | 3 (21.4)  | 1 (6.7)   | 16 (44.4) | 19 (25.3) | 50 (27.3)  | 157 (33.3) | 254 (37.9) | 320 (41.9) | 440 (45.0) |
| Ethanol                             | 1 (6.7)   | 4 (28.6)  | 3 (21.4)  | 0 (0.0)   | 9 (25.0)  | 14 (18.7) | 47 (25.7)  | 140 (29.7) | 214 (31.9) | 215 (28.2) | 304 (31.1) |
| Amphetamine                         | 0 (0.0)   | 0 (0.0)   | 0 (0.0)   | 0 (0.0)   | 0 (0.0)   | 2 (2.7)   | 10 (5.5)   | 13 (2.8)   | 19 (2.8)   | 41 (5.4)   | 56 (5.7)   |
| Xylazine                            | 0 (0.0)   | 0 (0.0)   | 0 (0.0)   | 0 (0.0)   | 0 (0.0)   | 0 (0.0)   | 0 (0.0)    | 0 (0.0)    | 0 (0.0)    | 0 (0.0)    | 73 (7.5)   |
| Gabapentin                          | 0 (0.0)   | 0 (0.0)   | 0 (0.0)   | 0 (0.0)   | 0 (0.0)   | 0 (0.0)   | 0 (0.0)    | 22 (4.7)   | 48 (7.2)   | 50 (6.6)   | 121 (12.4) |
| Mitragynine                         | 0 (0.0)   | 0 (0.0)   | 0 (0.0)   | 0 (0.0)   | 0 (0.0)   | 0 (0.0)   | 0 (0.0)    | 3 (0.6)    | 2 (0.3)    | 5 (0.7)    | 21 (2.1)   |

<sup>a</sup> Other includes Asian, American Indian, bi-racial, or other racial/ethnic groups

<sup>b</sup> Pharmaceutical opioids include di-H-codeine, hydromorphone, hydrocodone, oxycodone, and tramadol, but do not include methadone and buprenorphine

531  
532  
533

534 **Appendix S5**

535 Appendix S5. Figure 1. Spatial patterns of observed proportion being fentanyl-detected among opioid overdose deaths at the  
536 city/town level, stratified by year, 2009-2019. Towns with grey color represent no opioid-detected deaths. Note: link to the  
537 Connecticut Towns Index Map (<https://portal.ct.gov/-/media/DEEP/gis/Resources/IndexTownspdf.pdf>)

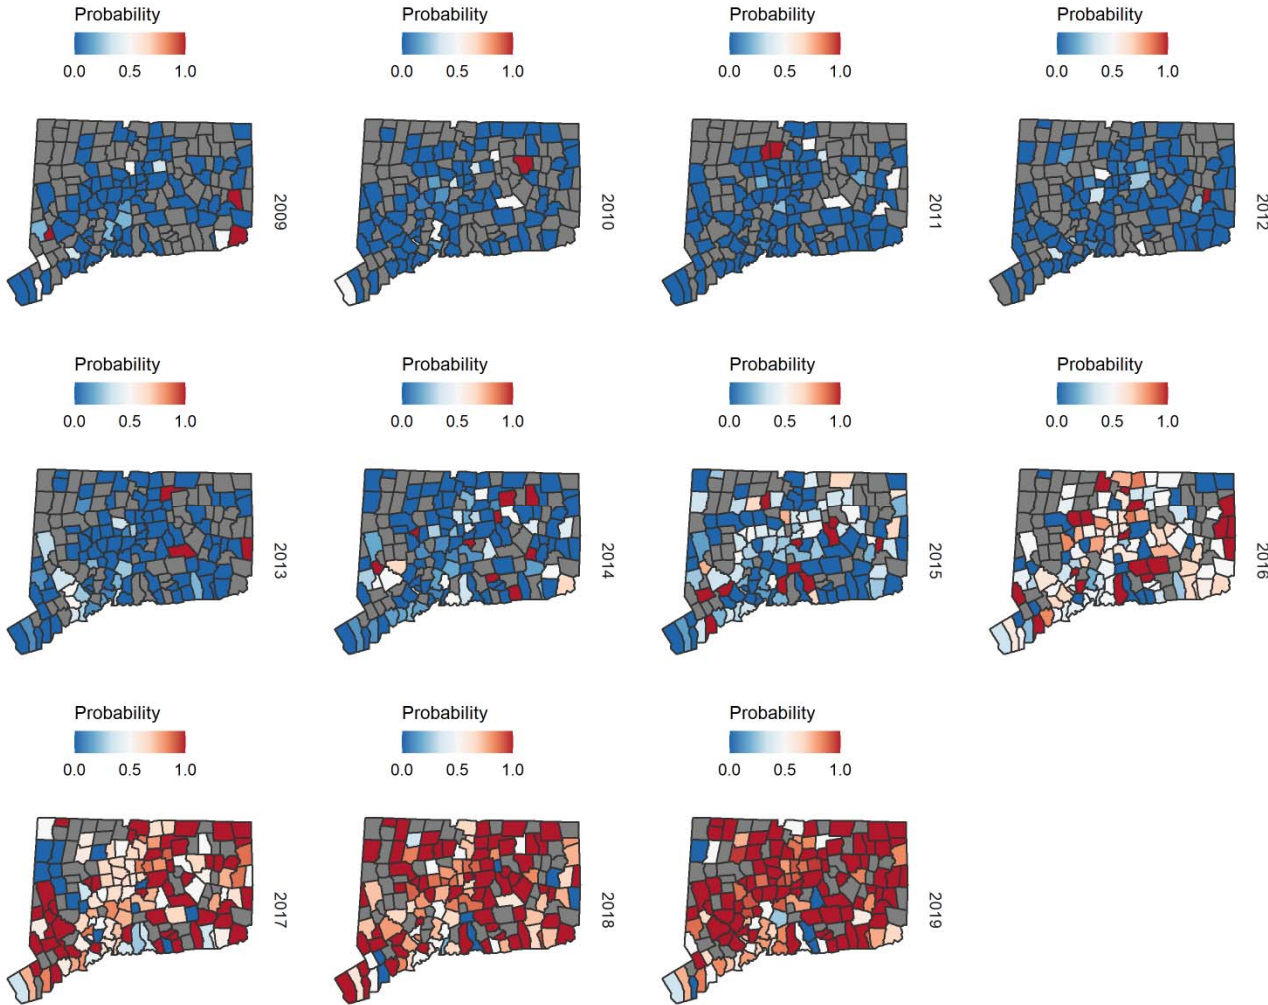

538  
539

540 **Appendix S6**

541 **Sensitivity Analysis 1**

542 Poisson model was used as an alternative to binomial model to estimate the risk of fentanyl-detected overdose deaths among  
543 opioid-detected overdose deaths at town level in Connecticut, 2009-2019. Specifically, we modelled the number of fentanyl-  
544 detected overdose deaths  $y_{it}$  in town  $i$  during year  $t$  as independently and identically Poisson distributed variables with mean  $\mu_{it}$ ,

$$y_{it} \sim \text{Poisson}(\mu_{it})$$

545 Then the logarithm of the mean number of fentanyl-detected overdose deaths ( $\mu_{it}$ ) is modeled as

$$\log(\mu_{it}) = \mathbf{x}_{it}^T \boldsymbol{\beta} + \alpha_i + \varphi_t + \delta_{it} + \log(od\_n)$$

546 where  $\mathbf{x}_{it}$  is the vector of covariates for town  $i$  at year  $t$  (including the time-varying and space-varying variables from ACS as  
547 aforementioned), and  $\boldsymbol{\beta}$  is a vector of fixed effect coefficients for  $\mathbf{x}_{it}$ . In addition,  $\alpha_i$  in the model is town-level spatial main effect,  
548  $\varphi_t$  is the yearly temporal main effect, and  $\delta_{it}$  is the interaction term between space (town level) and time (year). The number of  
549 overall opioid-detected overdose deaths in each town in each year was used as an offset  $\log(od\_n)$ .

550

551 Specifically, the spatial term  $\alpha_i$  is a random effect that follows the conditional autoregressive model proposed by Besag, York and  
552 Mollie.<sup>19</sup> The random effect can be further decomposed into two components, an intrinsic conditional autoregressive term that  
553 smooths each town-level estimate by forming a weighted average with all adjacent census tracts, plus spatially unstructured  
554 component that models independent location-specific error and is assumed to be independently identically normally distributed  
555 across towns. The temporal trend  $\varphi_t$ , is modeled by the sum of two components, a first-order random walk-correlated time  
556 component, and a temporally unstructured component that models independent year-specific error and is independently identically  
557 and normally distributed across calendar years. The space-time interaction term  $\delta_{it}$ , is modelled as an independent noise term for  
558 each town and time period, and allows for temporal trends in a given towns to deviate from the overall spatial and temporal trends  
559 given by  $\alpha_i$  and  $\varphi_t$ , such that local patterns can emerge across time and space. The results were shown in Appendix S6 Figure 1.

560

561 Appendix S6. Figure 1. Posterior distributions of estimated parameters for spatial ( $\alpha_i$ ) and temporal ( $\varphi_t$ ) random effects from the  
562 Bayesian space-time Poisson model for fentanyl-detected overdose deaths. The random effects were exponentiated. Larger values  
563 of exponentiated coefficients indicate the higher risk of being fentanyl-detected among all opioid overdose death at town level in  
564 Connecticut. Note: link to the Connecticut Towns Index Map (<https://portal.ct.gov/-/media/DEEP/gis/Resources/IndexTowns.pdf>)

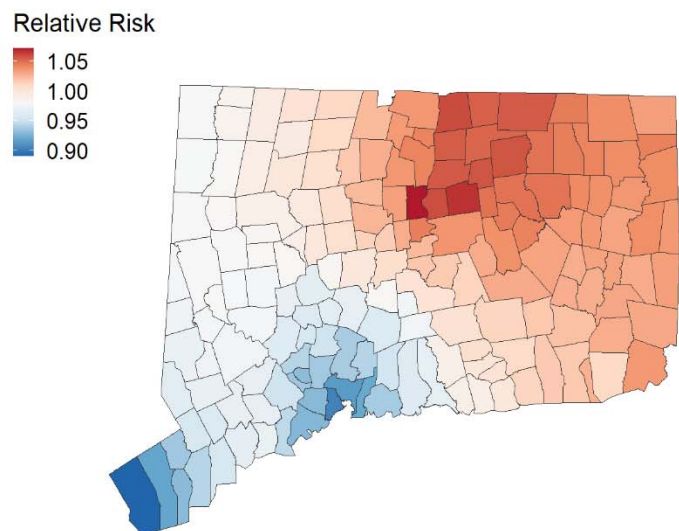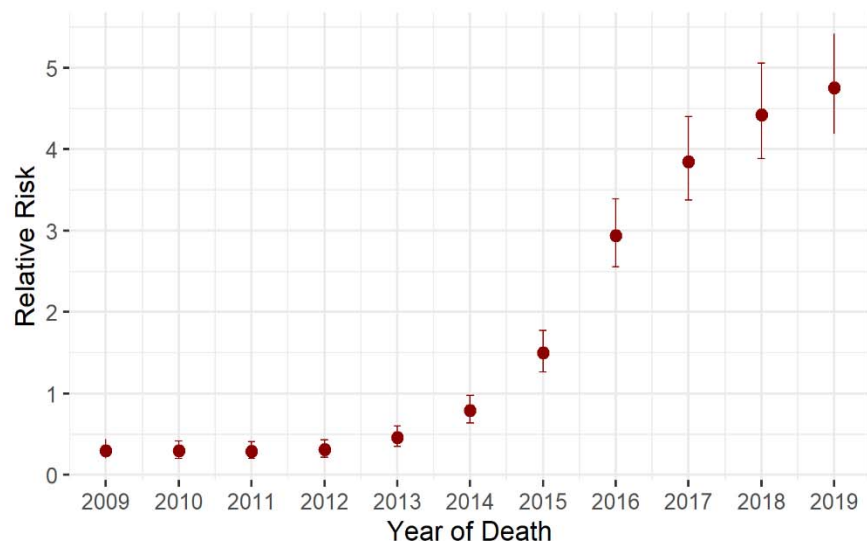

565

566

567 **Sensitivity Analysis 2**

568 In this sensitivity analysis, we still used the binomial model as described in the main text Methods section. We restricted the  
569 analytical sample to adult (aged  $\geq 18$ ) opioid-detected overdose deaths, and modeled the probability of being fentanyl-detected  
570 given an adult opioid overdose death in the binomial model. We included the town-level adult population size instead of the town-  
571 level total population size as a covariate. As a result, 6618 adult opioid-detected overdose deaths were included in this sensitivity  
572 analysis, with 18 (aged  $< 18$ ) deaths excluded (4 were fentanyl-detected). The results were shown in Appendix S6 Figure 2.  
573

574 Appendix S6. Figure 2. Posterior geometric means of the autoregressive spatial ( $\mu_i$ ) and temporal ( $\varphi_t$ ) random effects from the  
575 Bayesian space-time binomial model for adult fentanyl-detected overdose deaths. The left panel depicts the spatial patterns of adult  
576 fentanyl-detected overdose deaths when holding temporal terms and other covariates constant. The right panel depicts the  
577 temporal patterns of adult fentanyl-detected overdose deaths when holding spatial terms and other covariates constant. The  
578 random effects were exponentiated. Larger values of exponentiated coefficients indicate the higher probability being fentanyl  
579 detected given an opioid overdose death at town level in Connecticut. Note: link to the Connecticut Towns Index Map  
580 (<https://portal.ct.gov/-/media/DEEP/gis/Resources/IndexTownspdf.pdf>)  
581

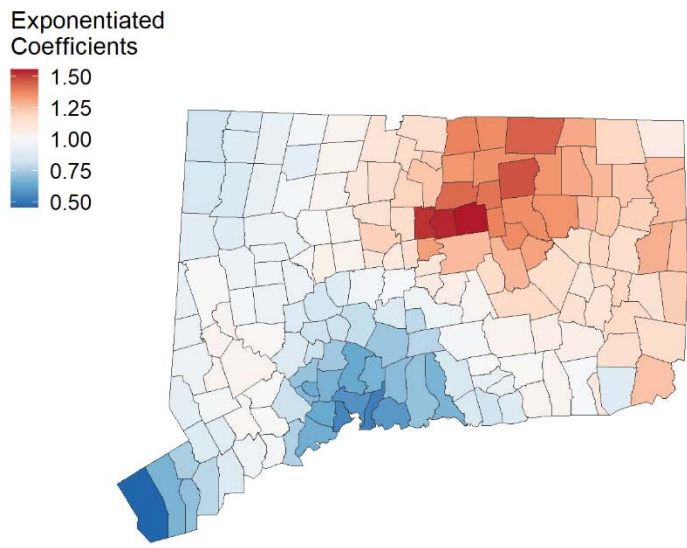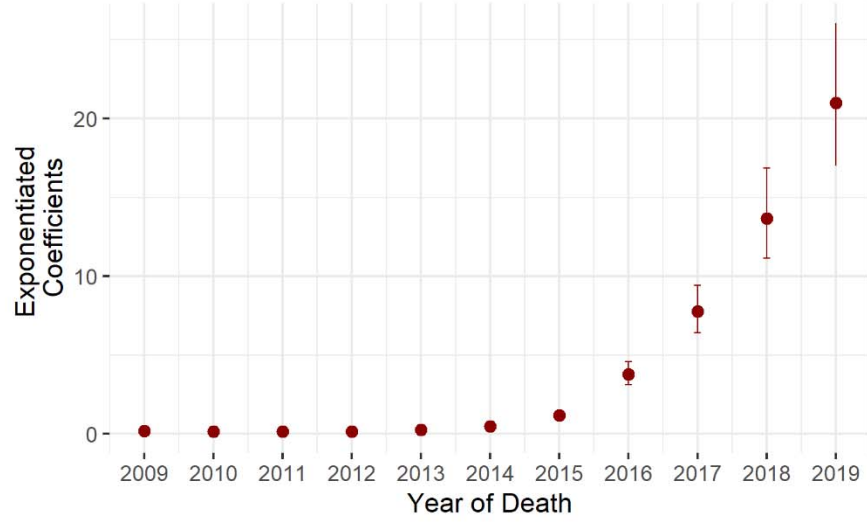

582  
583

584 **Sensitivity Analysis 3**

585 In this sensitivity analysis, instead of using gamma priors for precision hyperparameters in Bayesian space-time Poisson model for  
586 overall opioid-detected overdose deaths, we employed penalized complexity (PC) priors for the prior distribution of  
587 hyperparameters. The hyperprior distributions are chosen with the PC framework. We let the precision parameters  $\tau_u, \tau_v, \tau_\pi$  and  $\tau_\rho$   
588 (as described in Appendix S1)  $\sim PC(0.2/0.31, 0.01)$ , which corresponds to  $Pr(1/\sqrt{\tau} > 0.2/0.31) = 0.01$ , leading to the prior  
589 standard deviation being 0.2. The results of this sensitivity analysis were shown in Appendix S6 Figure 3.

590



591 Appendix S6. Figure 3. Posterior distributions of estimated parameters for spatial ( $\mu_i$ ) and temporal ( $\varphi_t$ ) random effects from the  
 592 Bayesian space-time binomial model for fentanyl-detected overdose deaths using penalized complexity priors for hyperparameters.  
 593 The left panel depicts the spatial patterns of fentanyl-detected overdose deaths when holding temporal terms and other covariates  
 594 constant. The right panel depicts the temporal patterns of fentanyl-detected overdose deaths when holding spatial terms and other  
 595 covariates constant. The random effects were exponentiated. Larger values of exponentiated coefficients indicate the higher  
 596 probability being fentanyl detected given an opioid overdose death at town level in Connecticut. Note: link to the Connecticut Towns  
 597 Index Map (<https://portal.ct.gov/-/media/DEEP/gis/Resources/IndexTownspdf.pdf>)

Exponentiated  
Coefficients

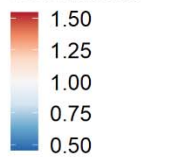
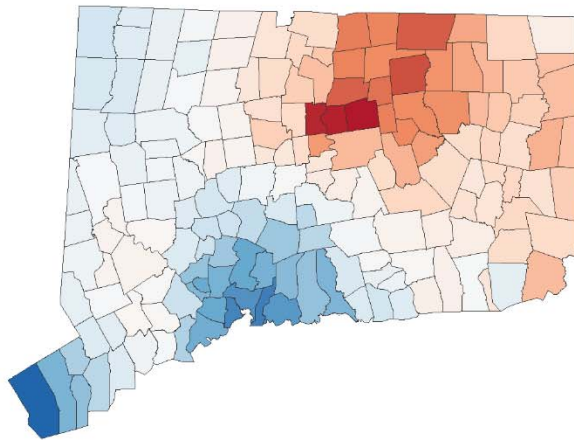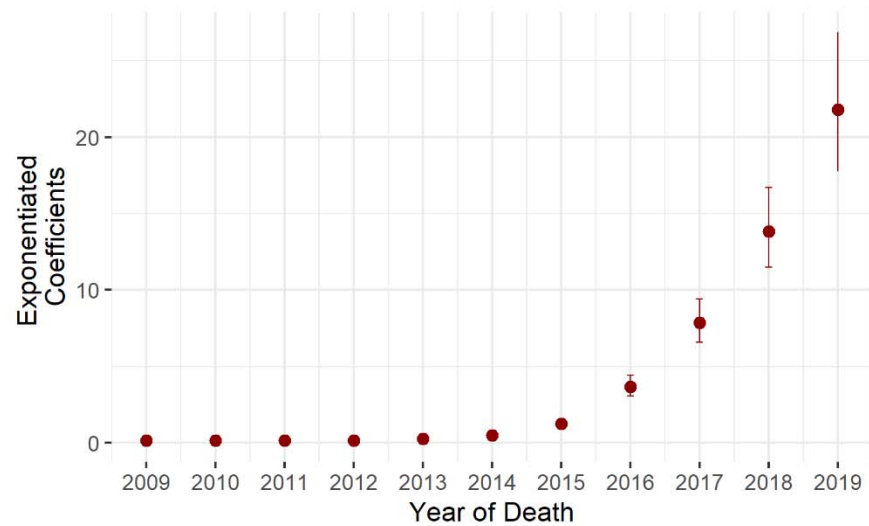

598  
599
